# Supplementary material
Source: PubMed Central journal article supplement (PMC3014675)
Supplement: 208634.f1.pdf [file 208634.f1.pdf]

**Supplemental materials:**

**Table II:** MALDI-TOF data of the associated proteins with MT-3.

| Protein ID                                   | MW                        | Score     | PPM/MISS | Peptide sequence         | Sequence  |
|----------------------------------------------|---------------------------|-----------|----------|--------------------------|-----------|
| HSP 84                                       | 85134                     | 68        |          |                          |           |
|                                              |                           |           | 200/0    | K.HNDDEQYAWESSAGGSFTVR.T | 154 - 173 |
|                                              |                           |           | 137/0    | K.EDQTEYLEER.R           | 192 - 201 |
|                                              |                           |           | 161/0    | K.TKPIWTR.N              | 294 - 300 |
|                                              |                           |           | 190/0    | R.NPDDITNEEYGEFYK.S      | 301 - 315 |
|                                              |                           |           | 124/0    | K.SLTNDWEEHLAVK.H        | 316 - 328 |
|                                              |                           |           | 86/0     | K.HFSVEGQLEFR.A          | 329 - 339 |
|                                              |                           |           | 216/0    | R.ALLFVPR.R              | 340 - 346 |
|                                              |                           |           | 134/0    | R.APFDLFENR.K            | 348 - 356 |
|                                              |                           |           | 185/0    | R.VFIMDNCEELIPEYLNfir.G  | 369 - 387 |
|                                              |                           |           | 104/0    | K.DQVANSafver.L          | 501 - 511 |
| 180/0                                        | R.LVTSPCCIVTSTYGWTANMER.I | 593 - 613 |          |                          |           |
| Exocyst<br>complex<br>component 8<br>(Exo84) | 81668                     | 65        |          |                          |           |
|                                              |                           |           | -101/1   | SDSGASRLR                | 2 - 10    |
|                                              |                           |           | -143/1   | RQLESGGFEAR              | 11 - 21   |
|                                              |                           |           | -45/1    | EGSGTGEEGKQR             | 140 - 151 |
|                                              |                           |           | -189     | GAVQAGFLPGPAGVPR         | 124 - 139 |
|                                              |                           |           | -248/1   | YNALYPLDRLAVVNVK         | 218 - 233 |
|                                              |                           |           | -89/1    | DMFKLLMFESR              | 240 - 251 |
|                                              |                           |           | -213/1   | NRAAAVHTAIR              | 425 - 435 |
|                                              |                           |           | -56/0    | ESLSTAAECVK              | 504 - 514 |

|                                                                                     |       |    |        |                           |           |
|-------------------------------------------------------------------------------------|-------|----|--------|---------------------------|-----------|
|                                                                                     |       |    | -72/1  | NSEEMWRR                  | 561 - 568 |
|                                                                                     |       |    | -30/0  | NSEEMWR                   | 561 - 567 |
|                                                                                     |       |    | 92/0   | CEQDPEK                   | 655 - 661 |
|                                                                                     |       |    | -50/1  | CEQDPEKK                  | 655 - 662 |
| DRP-2                                                                               | 62239 | 99 |        |                           |           |
|                                                                                     |       |    | -126/0 | R.MVIPGGIDVHTR.F          | 64 - 75   |
|                                                                                     |       |    | -100/0 | K.GIQEEMEALVK.D           | 147 - 157 |
|                                                                                     |       |    | -78/0  | R.DIGAIAQVHAENGDIIEEQQR.I | 190 - 211 |
|                                                                                     |       |    | -58/0  | K.DNFTLIPEGTNGTEER.M      | 346 - 361 |
|                                                                                     |       |    | 30/0   | R.MSVIWDK.A               | 362 - 368 |
|                                                                                     |       |    | -32/0  | K.VFNLYPR.K               | 391 - 397 |
|                                                                                     |       |    | -96/0  | K.IVLEDGTLHVTEGSGR.Y      | 452 - 467 |
|                                                                                     |       |    | -95/0  | R.KPFPDFVYK.R             | 472 - 480 |
|                                                                                     |       |    | 29/0   | K.QQAPPVR.N               | 526 - 532 |
|                                                                                     |       |    | -68/0  | R.NLHQSGFSLGAQIDDNIPR.R   | 533 - 552 |
|                                                                                     |       |    | 43/0   | R.IVAPPGGR.A              | 558 - 565 |
| ATP synthase,<br>H+<br>transporting<br>mitochondrial<br>F1 complex,<br>beta subunit | 56265 | 61 |        |                           |           |
|                                                                                     |       |    | -41/0  | R.LVLEVAQHLGESTVR.T       | 95 - 109  |
|                                                                                     |       |    | -33/0  | <b>K.IPVGPETLGR.I</b>     | 134 - 143 |
|                                                                                     |       |    | -64/0  | R.IMNVIGEPIDER.G          | 144 - 155 |
|                                                                                     |       |    | -51/0  | K.AHGGYSVFAGVGER.T        | 226 - 239 |
|                                                                                     |       |    | -38/0  | <b>K.VALVYQMNEPPGAR.A</b> | 265 - 279 |
|                                                                                     |       |    | -62/0  | <b>R.VALTGLTVAEYFR.D</b>  | 282 - 294 |
|                                                                                     |       |    | -65/0  | R.FTQAGSEVSALLGR.I        | 311 - 324 |
|                                                                                     |       |    | 29/0   | R.IPSAVGYQPTLATDMGTMQER.I | 325 - 345 |
|                                                                                     |       |    | -27/0  | R.AIAELGIYPAVDPLDSTSR.I   | 388 - 406 |

|                    |                               |           |                 |                                    |           |
|--------------------|-------------------------------|-----------|-----------------|------------------------------------|-----------|
|                    |                               |           | 0/0             | R.IMDPNIVGNEHYDVAR.G               | 407 - 422 |
| $\alpha$ - Enolase | 47322                         | 77        | -196/0          | R.GNPTVEVDLYTAK.G                  | 15 - 27   |
|                    |                               |           | -146/0          | R.AAVPSGASTGIYEALR.D               | 32 - 49   |
|                    |                               |           | -153/0          | K.LAMQEFMILPVGASSFR.E              | 162 - 178 |
|                    |                               |           | -125/0          | K.DATNVGDEGGFAPNILENK.E            | 202 - 220 |
|                    |                               |           | -154/0          | R.YITPDQLADLYK.S                   | 269 - 280 |
|                    |                               |           | -171/0          | K.LAQSNWGVMSHR.S                   | 358 - 371 |
|                    |                               |           | Creatine kinase | 42971                              | 85        |
| -162/0             | K.DLFDPIIEER.H                | 87 - 96   |                 |                                    |           |
| -119/0             | K.TDLNPDNLQGGDDLDPNYVLSSR.V   | 108 - 130 |                 |                                    |           |
| 188/1              | K.TDLNPDNLQGGDDLDPNYVLSSRVR.T | 108 - 132 |                 |                                    |           |
| -131/0             | R.GFCLPPHCSR.G                | 139 - 148 |                 |                                    |           |
| 76/0               | R.DWPDAR.G                    | 210 - 215 |                 |                                    |           |
| -155/0             | K.TFLVWINEEDHLR.V             | 224 - 236 |                 |                                    |           |
| -159/0             | R.FCTGLTQIETLFK.S             | 253 - 265 |                 |                                    |           |
| -117/0             | R.GTGGVDTAAVGGVFDVSNADR.L     | 321 - 341 |                 |                                    |           |
| -156/0             | R.LGFSEVELVQMVVDGVK.L         | 342 - 358 |                 |                                    |           |
| -93/0              | K.LLIEMEQR.L                  | 359 - 366 |                 |                                    |           |
| $\gamma$ -Actin    | 41335                         | 84        | 74/0            | K.AGFAGDDAPR.A                     | 12 - 21   |
|                    |                               |           | -21/0           | R.AVFPSIVGRPR.H                    | 22 - 32   |
|                    |                               |           | 1/0             | K.IWHHTFYNELR.V                    | 78 - 88   |
|                    |                               |           | 28/0            | R.VAPEEHPVLLTEAPLNPK.A             | 89 - 106  |
|                    |                               |           | 36/0            | R.TTGIVMDSGDGVTHTVPIYEGYALPHAILR.L | 141 - 170 |
|                    |                               |           | 12/0            | R.GYSFTTTAER.E                     | 190 - 199 |

|            |                                    |           |         |                                  |           |
|------------|------------------------------------|-----------|---------|----------------------------------|-----------|
|            |                                    |           | 42/0    | K.LCYVALDFEQEMATAASSSSLEK.S      | 209 – 231 |
|            |                                    |           | 21/0    | K.SYELPDGQVITIGNER.F             | 232 – 247 |
|            |                                    |           | 36/0    | K.DLYANTVLSGGTTMYPGIADR.M        | 285 – 305 |
|            |                                    |           | 123/0   | K.IIAPPER.K                      | 322 – 328 |
|            |                                    |           | -5/1    | R.KYSVWIGGSILASLSTFQQMWISK.Q     | 329 – 352 |
| Aldolase 1 | 39656                              | 84        | -41/0   | - .PHPYPALTPEQK.K                | 1 - 12    |
|            |                                    |           | 22/0    | R.VNPCIGGVILFHETLYQK.A           | 69 – 86   |
|            |                                    |           | -23/0   | <b>K.ADDGRFPQVIK.S</b>           | 87 - 98   |
|            |                                    |           | -37/1   | <b>K.ADDGRFPQVIKSK.G</b>         | 87 - 100  |
|            |                                    |           | 35/0    | K.GVVPLAGTNGETTTQGLDGLSER.C      | 111 - 133 |
|            |                                    |           | 49/0    | K.IGEHTPSALAIMENANVLAR.Y         | 153 - 172 |
|            |                                    |           | 36/1    | R.YASICQQNGIVPIVEPEILPDGDHDLKR.C | 173 - 200 |
|            |                                    |           | -4/1    | R.CQYVTEKVLAAVYK.A               | 201 - 214 |
|            |                                    |           | 17/0    | K.FSNEEIAMATVTALR.R              | 243 - 257 |
|            |                                    |           | -33/0   | R.ALANSLACQ GK.Y                 | 331 - 363 |
|            |                                    |           | 37/0    | K.YTPSGQSGAAASESLFISNHAY         | 342 - 363 |
|            |                                    |           | β-Actin | 39446                            | 86        |
| 41/0       | R.AVFPSIVGR.S                      | 3 - 11    |         |                                  |           |
| 1/-        | K.IWHHTFYNELR.V                    | 59 - 69   |         |                                  |           |
| 28/0       | <b>R.VAPEEHPVLLTEAPLNPK.A</b>      | 70 - 87   |         |                                  |           |
| 36/0       | R.TTGIVMDSGDGVTHTVPIYEGYALPHAILR.L | 122 - 151 |         |                                  |           |
| 12/0       | R.GYSFTTTAER.E                     | 171 - 180 |         |                                  |           |
| 42/0       | K.LCYVALDFEQEMATAASSSSLEK.S        | 190 - 212 |         |                                  |           |
| 21/0       | K.SYELPDGQVITIGNER.F               | 213 - 228 |         |                                  |           |
| 36/0       | K.DLYANTVLSGGTTMYPGIADR.M          | 266 - 286 |         |                                  |           |

|                         |                               |           |             |                              |           |
|-------------------------|-------------------------------|-----------|-------------|------------------------------|-----------|
|                         |                               |           | 123/0       | K.IIAPPER.K                  | 303 - 309 |
|                         |                               |           | -5/1        | R.KYSVWIGGSILASLSTFQQMWISK.Q | 310 - 333 |
| Malate<br>dehydrogenase | 36045                         | 68        | 85/0        | R.LTLYDIAHTPGVAADLSHIETR.A   | 53 - 74   |
|                         |                               |           | 43/0        | K.GYLGPEQLPDCLK.G            | 79 - 91   |
|                         |                               |           | 15/0        | K.GCDVVVIPAGVPR.K            | 92 - 104  |
|                         |                               |           | 24/0        | K.IFGVTTLDIVR.A              | 166 - 176 |
|                         |                               |           | 57/0        | K.VDFPQDQLATLTGR.I           | 216 - 229 |
|                         |                               |           | 51/0        | K.AGAGSATLSMAYAGAR.F         | 242 - 257 |
|                         |                               |           | 14-3-3 zeta | 27908                        | 76        |
| -99/0                   | K.SVTEQGAELSNEER.N            | 28 - 41   |             |                              |           |
| -16/0                   | R.NLLSVAYK.N                  | 42 - 49   |             |                              |           |
| -120/0                  | R.FLIPNASQPESK.N              | 104 - 115 |             |                              |           |
| 44/1                    | K.MKGDYYR.Y                   | 121 - 127 |             |                              |           |
| 17/1                    | K.MKGDYYR.Y Oxidation (M)     | 121 - 127 |             |                              |           |
| -104/1                  | R.YLAEVAAGDDKK.V              | 128 - 139 |             |                              |           |
| -107/2                  | K.KEMQPTHPIR.L                | 158 - 167 |             |                              |           |
| -42/0                   | K.EMQPTHPIR.L                 | 159 - 167 |             |                              |           |
| -55/0                   | k. KEMQPTHPIR.L Oxidation (M) | 159 - 167 |             |                              |           |
